# Supplementary material for: Bacterial natural product discovery by heterologous expression
Source: PubMed Central journal article supplement (PMC10727000; doi:10.1093/jimb/kuad044), 2023-12-05
Supplement: kuad044_supplemental_file.pdf [file kuad044_supplemental_file.pdf]

Supplemental information

## **Bacterial natural product discovery by heterologous expression**

A. Elodie Kadjo,<sup>a,b</sup> Alessandra S. Eustáquio<sup>a,b\*</sup>

<sup>a</sup>Department of Pharmaceutical Sciences, College of Pharmacy, University of Illinois at Chicago, Chicago, IL, 60607, USA

<sup>b</sup>Center for Biomolecular Sciences, College of Pharmacy, University of Illinois at Chicago, Chicago, IL 60607, USA

**SI Table S1. Summary of reviewed studies.**

| <b>Biosynthetic class</b> | <b>Rationale for BGC prioritization</b> | <b>Cloning method</b> | <b>BGC Source</b>                                                                     | <b>Host choice</b>                                                              | <b>Source taxa (class)</b> | <b>Host taxa (class)</b> | <b>Natural Products</b>                                     | <b>Ref.</b>             |
|---------------------------|-----------------------------------------|-----------------------|---------------------------------------------------------------------------------------|---------------------------------------------------------------------------------|----------------------------|--------------------------|-------------------------------------------------------------|-------------------------|
| PKS, NRPS, hybrid thereof | Biosynthetic class                      | Library               | 100 <i>Streptomyces</i> strains                                                       | <i>S. albus</i> J1074, <i>S. lividans</i> RedStrep 1.7                          | Actinomycetia              | Actinomycetia            | Prolinolexin, Cinnamexin, Conkatamycin                      | (Libis et al. 2022)     |
| Multiple classes          | Structural novelty                      | Assembly              | 14 <i>Streptomyces</i> and 3 <i>Bacillus</i>                                          | <i>S. avermitilis</i> SUKA17, <i>S. lividans</i> TK24, <i>B. subtilis</i> JH642 | Actinomycetia              | Actinomycetia            | Bipentarymycins, Allenomycins, Angucyclines, Anthraquinones | (Enghiad et al. 2021)   |
| RiPP                      | Structural novelty                      | Synthesis & Assembly  | <i>Marinicella sediminis</i> F2T                                                      | <i>E. coli</i> BL21 (DE3)                                                       | Gamma-proteobacteria       | Gamma-proteobacteria     | Marinsedin                                                  | (Han et al. 2022)       |
| PKS, NRPS, hybrid thereof | Structural novelty                      | Library               | <i>S. versipellis</i> 4083-SVS6                                                       | <i>S. lividans</i> TK23                                                         | Actinomycetia              | Actinomycetia            | Polyene compound JBIR-159                                   | (Hashimoto et al. 2021) |
| Multiple classes          | Structural novelty                      | Assembly              | <i>Streptococcus</i> strains, <i>Staphylococcus</i> strain, <i>Clostridium</i> strain | <i>Streptococcus mutans</i> UA159                                               | Bacilli                    | Bacilli                  | Lipopeptide SNC1-465                                        | (Hao et al. 2019)       |
| RiPP                      | Structural novelty                      | Synthesis & Assembly  | <i>Bacillus amyloliquefaciens</i>                                                     | <i>E. coli</i> BL21 (DE3)                                                       | Bacilli                    | Gamma-proteobacteria     | Amylopeptins                                                | (Zang et al. 2021)      |
| PKS, NRPS, hybrid thereof | Structural novelty                      | Library & Assembly    | <i>S. albus</i> ssp. <i>chlorinus</i> NRRL B-24108                                    | <i>S. albus</i> Del14                                                           | Actinomycetia              | Actinomycetia            | Bosecamin                                                   | (Lasch et al. 2021)     |

|                           |                    |                      |                                                                                                                                                           |                                                |                      |                      |                                        |                                 |
|---------------------------|--------------------|----------------------|-----------------------------------------------------------------------------------------------------------------------------------------------------------|------------------------------------------------|----------------------|----------------------|----------------------------------------|---------------------------------|
| PKS, NRPS, hybrid thereof | Structural novelty | Library              | <i>S. sp.</i> NA03103                                                                                                                                     | <i>S. lividans</i> SBT18                       | Actinomycetia        | Actinomycetia        | Ashimides                              | (Shi et al. 2019)               |
| PKS, NRPS, hybrid thereof | Structural novelty | Synthesis & Assembly | <i>Nocardia</i> strains associated with nocardiosis                                                                                                       | <i>E. coli</i>                                 | Actinomycetia        | Gamma-proteobacteria | NOCAP (nocardis associated polyketide) | (Yuet et al. 2020)              |
| Other                     | Structural novelty | Synthesis & Assembly | <i>Pseudoalteromonas rubra</i> , <i>Rheinheimera pacifica</i> , <i>Colwellia chukchiensis</i> , <i>Skermanella aerolata</i> , <i>Undibacterium pigrum</i> | <i>E. coli</i>                                 | Many                 | Gamma-proteobacteria | Tyrazolones, Phenazolones              | (De Rond, Asay, and Moore 2021) |
| RiPP                      | Structural novelty | Synthesis & Assembly | <i>Pseudoalteromonas flavipulchra</i> S16                                                                                                                 | <i>E. coli</i> BL21 (DE3)                      | Gamma-proteobacteria | Gamma-proteobacteria | Pseudorosins                           | (Wang et al. 2023)              |
| PKS, NRPS, hybrid thereof | Structural novelty | Library              | <i>S. sp.</i> B59                                                                                                                                         | <i>S. albus</i> J1074                          | Actinomycetia        | Actinomycetia        | Shuangdaolides                         | (Y. Liu et al. 2021)            |
| PKS, NRPS, hybrid thereof | Structural novelty | Library & Assembly   | <i>S. albus ssp. Chlorinus</i> NRRL B-24108                                                                                                               | <i>S. albus</i> Del14, <i>S. lividans</i> Del8 | Actinomycetia        | Actinomycetia        | Dudomycins                             | (Lasch, Stierhof, et al. 2020)  |

|                           |                    |                      |                                                      |                                                                             |                      |                      |                |                                       |
|---------------------------|--------------------|----------------------|------------------------------------------------------|-----------------------------------------------------------------------------|----------------------|----------------------|----------------|---------------------------------------|
| Other                     | Structural novelty | Synthesis & Assembly | <i>S. venezuelae</i> ATCC 15439                      | <i>S. venezuelae</i> ,<br><i>S. coelicolor</i>                              | Actinomycetia        | Actinomycetia        | Venezuelaenes  | (Li et al. 2020)                      |
| PKS, NRPS, hybrid thereof | Structural novelty | Library              | <i>Frankia alni</i> strain ACN14a                    | <i>S. albus</i> Del14                                                       | Actinomycetia        | Actinomycetia        | Fralnimycin    | (Myronovskyi et al. 2018)             |
| PKS, NRPS, hybrid thereof | Structural novelty | Library & Assembly   | <i>Sorangiiineae</i> strain MSr11367                 | <i>Myxococcus xanthus</i> DK1622                                            | Myxococcia           | Myxococcia           | Sorangibactin  | (Gao et al. 2023)                     |
| Other                     | Structural novelty | Library              | <i>Micromonospora</i> sp. SCSIO 07395 (actinomycete) | <i>S. albus</i> J1074,<br><i>S. albus</i> del14                             | Actinomycetia        | Actinomycetia        | Microechmycins | (Cheng et al. 2023)                   |
| RiPP                      | Structural novelty | Synthesis & Assembly | <i>Thermobifida fusca</i>                            | <i>E. coli</i> BL21                                                         | Actinomycetia        | Gamma-proteobacteria | Fuscanodin     | (Koos and Link 2019)                  |
| RiPP                      | Structural novelty | Synthesis & Assembly | <i>Marinomonas fungiae</i> strain JCM 18476 T        | <i>E. coli</i> BL21 (DE3)                                                   | Gamma-proteobacteria | Gamma-proteobacteria | Marinomonasin  | (Kaweewan, Nakagawa, and Kodani 2021) |
| PKS, NRPS, hybrid thereof | Structural novelty | Library              | <i>S. seoulensis</i> A01                             | <i>S. lividans</i> SBT18, <i>S. coelicolor</i> M1146, <i>S. albus</i> J1074 | Actinomycetia        | Actinomycetia        | Ansaseomycin   | (S. H. Liu et al. 2019)               |
| Other                     | Structural novelty | Library & Assembly   | <i>Kutzneria albida</i> DSM 43870                    | <i>S. albus</i> Del14                                                       | Actinomycetia        | Actinomycetia        | Huimycin       | (Shuai et al. 2020)                   |

|                           |                    |                      |                                      |                                                   |                      |                      |                      |                                  |
|---------------------------|--------------------|----------------------|--------------------------------------|---------------------------------------------------|----------------------|----------------------|----------------------|----------------------------------|
| PKS, NRPS, hybrid thereof | Structural novelty | Library & Assembly   | <i>Micromonospora endolithica</i>    | <i>S. albus</i> Del14                             | Actinomycetia        | Actinomycetia        | Loseolamycins        | (Lasch, Gummerlich, et al. 2020) |
| PKS, NRPS, hybrid thereof | Structural novelty | Library & Assembly   | <i>S. mirabilis</i> Lu17588          | <i>S. albus</i> Del14                             | Actinomycetia        | Actinomycetia        | Miramides            | (Paulus et al. 2022)             |
| RiPP                      | Structural novelty | Synthesis & Assembly | <i>Pedobacter lusitanus</i> NL19     | <i>E. coli</i>                                    | Sphingobacteriia     | Gamma-proteobacteria | PedAs                | (Bothwell et al. 2021)           |
| Multiple classes          | Structural novelty | Library & Assembly   | <i>Saccharothrix espanaensis</i>     | <i>S. lividans</i> DYA6, <i>S. albus</i> J1074    | Actinomycetia        | Actinomycetia        | Pentangumycin, SEK90 | (Gummerlich et al. 2020)         |
| PKS, NRPS, hybrid thereof | Structural novelty | Assembly             | <i>S. sclerotialus</i> NRRL ISP-5269 | <i>S. albus</i> J1074, <i>S. coelicolor</i> M1152 | Actinomycetia        | Actinomycetia        | Scleric acid         | (Alberti et al. 2019)            |
| RiPP                      | Structural novelty | Synthesis & Assembly | <i>Thalassomonas viridans</i> XOM25T | <i>E. coli</i>                                    | Gamma-proteobacteria | Gamma-proteobacteria | VsdsAs               | (Vermeulen et al. 2022)          |
| Other                     | Structural novelty | Assembly             | <i>S. leeuwenhoekii</i> NRRL B-24963 | <i>S. coelicolor</i> M1146, <i>S. albus</i> J1074 | Actinomycetia        | Actinomycetia        | Streptoazines        | (Zhang et al. 2021)              |
| RiPP                      | Structural novelty | Synthesis & Assembly | <i>Grimontia marina</i>              | <i>E. coli</i> BL21 (DE3)                         | Gamma-proteobacteria | Gamma-proteobacteria | Grimoviridin         | (Unno et al. 2020)               |
| PKS, NRPS, hybrid thereof | Biosynthetic class | Assembly             | <i>S. chrestomyceticus</i>           | <i>S. lividans</i> TK24                           | Actinomycetia        | Actinomycetia        | Guanipiperazines     | (Shi et al. 2021)                |

|       |                    |                      |                                                                                                                                                            |                                                 |                      |                      |                            |                          |
|-------|--------------------|----------------------|------------------------------------------------------------------------------------------------------------------------------------------------------------|-------------------------------------------------|----------------------|----------------------|----------------------------|--------------------------|
| Other | Biosynthetic class | Synthesis & Assembly | <i>S. monomycini</i>                                                                                                                                       | <i>S. coelicolor</i> M1146                      | Actinomycetia        | Actinomycetia        | Guanitrypmycins            | (Liu et al. 2019)        |
| RiPP  | Biosynthetic class | Synthesis & Assembly | Bacteroidota, Pseudomonadota, Cyanobacteriota, Actinomycetota and Bacillota                                                                                | <i>E. coli</i> BL21 (DE3)                       | Many                 | Gamma-proteobacteria | LanII, LanII-2A, LanII-2B  | (Ayikpoe et al. 2022)    |
| RiPP  | Biosynthetic class | Assembly             | <i>Microbacterium paraoxydans</i> DSM 15019                                                                                                                | <i>S. lividans</i> TK24, <i>S. albus</i> J1074. | Actinomycetia        | Actinomycetia        | Daptides                   | (Ren et al. 2023)        |
| RiPP  | Biosynthetic class | Synthesis & Assembly | <i>Methylovulum psychrotolerans</i>                                                                                                                        | <i>E. coli</i>                                  | Gamma-proteobacteria | Gamma-proteobacteria | Mpr RiPPs                  | (Nguyen et al. 2022)     |
| RiPP  | Biosynthetic class | Synthesis & Assembly | <i>Cyanobacterium Kamptonema</i> sp. PCC 6506                                                                                                              | <i>E. coli</i> BL21 (DE3)                       | Cyanophyceae         | Gamma-proteobacteria | Landornamides              | (Bösch et al. 2020)      |
| RiPP  | Biosynthetic class | Synthesis & Assembly | <i>Actinoalloteichus fjordicus</i> ADI127-1, <i>S. sp.</i> ADI94-01, <i>S. sp.</i> ADI98-10, <i>S. noursei</i> ATCC 11455, <i>S. venezuelae</i> ATCC 10712 | <i>S. albus</i> J1074, <i>S. lividans</i> TK24  | Actinomycetia        | Actinomycetia        | 9401_LP1, 9810_LP, Snou_LP | (Mevaere et al. 2018)    |
| RiPP  | Biosynthetic class | Synthesis & Assembly | <i>Enterobacter cloacae</i> complex                                                                                                                        | <i>E. coli</i>                                  | Gamma-proteobacteria | Gamma-proteobacteria | Cloacaenodin               | (Carson et al. 2023)     |
| RiPP  | Biosynthetic class | Synthesis & Assembly | <i>Burkholderia ubonensis</i> MSMB2207                                                                                                                     | <i>E. coli</i> BL21                             | Beta proteobacteria  | Gamma-proteobacteria | Ubonodin                   | (Cheung-Lee et al. 2020) |

|                           |                                   |                      |                                                                      |                                                                                 |                      |                      |                            |                                  |
|---------------------------|-----------------------------------|----------------------|----------------------------------------------------------------------|---------------------------------------------------------------------------------|----------------------|----------------------|----------------------------|----------------------------------|
| RiPP                      | Biosynthetic class                | Synthesis & Assembly | <i>Pandoraea norimbergensis</i>                                      | <i>E. coli</i> BL21                                                             | Beta proteobacteria  | Gamma-proteobacteria | Pandonodin                 | (Cheung-Lee, Cao, and Link 2019) |
| RiPP                      | Biosynthetic class                | Synthesis & Assembly | <i>S. leeuwenhoekii</i> C34T                                         | <i>S. coelicolor</i> M1152, <i>S. coelicolor</i> M1154                          | Actinomycetia        | Actinomycetia        | Leepeptin                  | (Gomez-Escribano et al. 2019)    |
| RiPP                      | Biosynthetic class                | Synthesis & Assembly | <i>Thermobifida cellulosilytica</i> , <i>Lihuaxuella thermophila</i> | <i>E. coli</i> BL21 (DE3)                                                       | Many                 | Gamma-proteobacteria | Cellulonodin-2, Lihuanodin | (Cao et al. 2021)                |
| RiPP                      | Biosynthetic class                | Synthesis & Assembly | <i>Synechococcus</i> MITS9509                                        | <i>Lactococcus lactis</i> NZ9000                                                | Cyanophyceae         | Bacilli              | SyncAs                     | (Arias-Orozco et al. 2021)       |
| RiPP                      | Biosynthetic class                | Synthesis & Assembly | <i>Thermosporothrix hazakensis</i>                                   | <i>E. coli</i> BL21 (DE3)                                                       | Ktedonobacteria      | Gamma-proteobacteria | Hazakensins                | (Kaweewan et al. 2023)           |
| RiPP                      | Biosynthetic class                | Synthesis & Assembly | <i>S. roseosprus</i> NRRL 11379                                      | <i>E. coli</i> BL21 (DE3)                                                       | Actinomycetia        | Gamma-proteobacteria | Roseocins                  | (Singh et al. 2019)              |
| RiPP                      | Biosynthetic class                | Synthesis & Assembly | <i>Thalassomonas actiniarum</i>                                      | <i>E. coli</i> BL21 (DE3)                                                       | Gamma-proteobacteria | Gamma-proteobacteria | Thalassomonasins           | (Thetsana et al. 2022)           |
| RiPP                      | Biosynthetic class                | Assembly             | <i>S. varsoviensis</i>                                               | <i>S. lividans</i> TK24, <i>S. coelicolor</i> M1146, <i>S. coelicolor</i> M1152 | Actinomycetia        | Actinomycetia        | Thiovarsolins              | (Santos-Aberturas et al. 2019)   |
| PKS, NRPS, hybrid thereof | Structural similarity to known NP | Library & Assembly   | Soil metagenome                                                      | <i>S. albus</i> J1074                                                           | Unknown              | Actinomycetia        | Cadasides                  | (Wu et al. 2019)                 |

|                           |                                   |                    |                                                                    |                         |               |               |                |                     |
|---------------------------|-----------------------------------|--------------------|--------------------------------------------------------------------|-------------------------|---------------|---------------|----------------|---------------------|
| PKS, NRPS, hybrid thereof | Structural similarity to known NP | Library & Assembly | Soil metagenome                                                    | <i>S. albus</i> J1074   | Unknown       | Actinomycetia | Malacidins     | (Hover et al. 2018) |
| PKS, NRPS, hybrid thereof | Structural similarity to known NP | Assembly           | <i>Amycolatopsis</i> sp. WAC01416 and 7 <i>Streptomyces</i> strain | <i>S. coelicolor</i>    | Actinomycetia | Actinomycetia | GP6738, GP6738 | (Xu et al. 2020)    |
| RiPP                      | Activity                          | Library            | <i>S. rochei</i> Sal35                                             | <i>S. lividans</i> GX28 | Actinomycetia | Actinomycetia | Lexapeptide    | (Xu et al. 2020)    |

## References

Alberti, Fabrizio, Daniel J. Leng, Ina Wilkening, Lijiang Song, Manuela Tosin, and Christophe Corre. 2019. "Triggering the Expression of a Silent Gene Cluster from Genetically Intractable Bacteria Results in Scleric Acid Discovery." *Chemical Science* 10 (2): 453–63. <https://doi.org/10.1039/C8SC03814G>.

Arias-Orozco, Patricia, Maartje Inklaar, Judith Lanooij, Rubén Cebrián, and Oscar P. Kuipers. 2021. "Functional Expression and Characterization of the Highly Promiscuous Lanthipeptide Synthetase SyncM, Enabling the Production of Lanthipeptides with a Broad Range of Ring Topologies." *ACS Synthetic Biology* 10 (10): 2579–91. <https://doi.org/10.1021/acssynbio.1c00224>.

Ayikpoe, Richard S., Chengyou Shi, Alexander J. Battiste, Sara M. Eslami, Sangeetha Ramesh, Max A. Simon, Ian R. Bothwell, et al. 2022. "A Scalable Platform to Discover Antimicrobials of Ribosomal Origin." *Nature Communications* 13 (1): 6135. <https://doi.org/10.1038/s41467-022-33890-w>.

Bothwell, Ian R., Tânia Caetano, Raymond Sarkisian, Sónia Mendo, and Wilfred A. Van Der Donk. 2021. "Structural Analysis of Class I Lanthipeptides from *Pedobacter Lusitanus* NL19 Reveals an Unusual Ring Pattern." *ACS Chemical Biology* 16 (6): 1019–29. <https://doi.org/10.1021/acscchembio.1c00106>.

Bösch Nina M., Borsa Mariana, Greczmiel Ute, Morinaka Brandon I., Gugger Muriel, Oxenius Annette, Vagstad Anna L., Piel Jörn. 2020. Landornamides: Antiviral Ornithine-Containing Ribosomal Peptides Discovered through Genome Mining *Angewandte Chemie (International ed. in English)*, 59, 11763. <https://doi.org/10.1002/anie.201916321>.



Cao, Li, Moshe Beiser, Joseph D. Koos, Margarita Orlova, Hader E. Elashal, Hendrik V. Schröder, and A. James Link. 2021. "Cellulonodin-2 and Lihuanodin: Lasso Peptides with an Aspartimide Post-Translational Modification." *Journal of the American Chemical Society* 143 (30): 11690–702. <https://doi.org/10.1021/jacs.1c05017>.

Carson, Drew V., Monica Patiño, Hader E. Elashal, Alexis Jaramillo Cartagena, Yi Zhang, Megan E. Whitley, Larry So, et al. 2023. "Cloacaenodin, an Antimicrobial Lasso Peptide with Activity against *Enterobacter*." *ACS Infectious Diseases* 9 (1): 111–21. <https://doi.org/10.1021/acsinfecdis.2c00446>.

Cheng, Ziqian, Qingbo Zhang, Jing Peng, Xiaoyang Zhao, Liang Ma, Changsheng Zhang, and Yiguang Zhu. 2023. "Genomics-Driven Discovery of Benzoxazole Alkaloids from the Marine-Derived Micromonospora Sp. SCSIO 07395." *Molecules* 28 (2): 821. <https://doi.org/10.3390/molecules28020821>.

Cheung-Lee, Wai Ling, Li Cao, and A. James Link. 2019. "Pandonodin: A Proteobacterial Lasso Peptide with an Exceptionally Long C-Terminal Tail." *ACS Chemical Biology* 14 (12): 2783–92. <https://doi.org/10.1021/acscchembio.9b00676>.

Cheung-Lee, Wai Ling, Madison E. Parry, Chuhan Zong, Alexis Jaramillo Cartagena, Seth A. Darst, Nancy D. Connell, Riccardo Russo, and A. James Link. 2020. "Discovery of Ubonodin, an Antimicrobial Lasso Peptide Active against Members of the *Burkholderia Cepacia* Complex." *ChemBioChem* 21 (9): 1335–40. <https://doi.org/10.1002/cbic.201900707>.

De Rond, Tristan, Julia E. Asay, and Bradley S. Moore. 2021. "Co-Occurrence of Enzyme Domains Guides the Discovery of an Oxazolone Synthetase." *Nature Chemical Biology* 17 (7): 794–99. <https://doi.org/10.1038/s41589-021-00808-4>.

Enghiad, Behnam, Chunshuai Huang, Fang Guo, Guangde Jiang, Bin Wang, S. Kasra Tabatabaei, Teresa A. Martin, and Huimin Zhao. 2021. "Cas12a-Assisted Precise Targeted Cloning Using in Vivo Cre-Lox Recombination." *Nature Communications* 12 (1): 1171. <https://doi.org/10.1038/s41467-021-21275-4>.

Gao, Yunsheng, Christine Walt, Chantal D. Bader, and Rolf Müller. 2023. "Genome-Guided Discovery of the Myxobacterial Thiolactone-Containing Sorangibactins." *ACS Chemical Biology* 18 (4): 924–32. <https://doi.org/10.1021/acscchembio.3c00063>.

Gomez-Escribano, Juan Pablo, Jean Franco Castro, Valeria Razmilic, Scott A. Jarmusch, Gerhard Saalbach, Rainer Ebel, Marcel Jaspars, Barbara Andrews, Juan A. Asenjo, and Mervyn J. Bibb. 2019. "Heterologous Expression of a Cryptic Gene Cluster from *Streptomyces Leeuwenhoekii* C34<sup>T</sup> Yields a Novel Lasso Peptide, Leepeptin." Edited by Andrew J. McBain. *Applied and Environmental Microbiology* 85 (23): e01752-19. <https://doi.org/10.1128/AEM.01752-19>.

Gummerlich, Nils, Yuriy Rebets, Constanze Paulus, Josef Zapp, and Andriy Luzhetskyy. 2020. "Targeted Genome Mining—From Compound Discovery to Biosynthetic Pathway Elucidation." *Microorganisms* 8 (12): 2034. <https://doi.org/10.3390/microorganisms8122034>.

Han, Yu, Xiaotong Wang, Youming Zhang, and Liujie Huo. 2022. "Discovery and Characterization of Marinsedin, a New Class II Lanthipeptide Derived from Marine Bacterium *Marinicella Sediminis* F2<sup>T</sup>." *ACS Chemical Biology* 17 (4): 785–90. <https://doi.org/10.1021/acscchembio.2c00021>.

Hao, Tingting, Zhoujie Xie, Min Wang, Liwei Liu, Yuwei Zhang, Weicang Wang, Zhao Zhang, et al. 2019. "An Anaerobic Bacterium Host System for Heterologous Expression of Natural Product Biosynthetic Gene Clusters." *Nature Communications* 10 (1): 3665. <https://doi.org/10.1038/s41467-019-11673-0>.

Hashimoto, Takuya, Junko Hashimoto, Noritaka Kagaya, Takehiro Nishimura, Hikaru Suenaga, Makoto Nishiyama, Tomohisa Kuzuyama, and Kazuo Shin-ya. 2021. "A Novel Oxazole-Containing Tetraene Compound, JBIR-159, Produced by Heterologous Expression of the Cryptic Trans-AT Type Polyketide Synthase Biosynthetic Gene Cluster." *The Journal of Antibiotics* 74 (5): 354–58. <https://doi.org/10.1038/s41429-021-00410-9>.

Hover, Bradley M., Seong-Hwan Kim, Micah Katz, Zachary Charlop-Powers, Jeremy G. Owen, Melinda A. Ternei, Jeffrey Maniko, et al. 2018. "Culture-Independent Discovery of the Malacidins as Calcium-Dependent Antibiotics with Activity against Multidrug-Resistant Gram-Positive Pathogens." *Nature Microbiology* 3 (4): 415–22. <https://doi.org/10.1038/s41564-018-0110-1>.

Kaweewan, Issara, Shinta Ijichi, Hiroyuki Nakagawa, and Shinya Kodani. 2023. "Heterologous Production of New Lanthipeptides Hazakensins A and B Using a Cryptic Gene Cluster of the Thermophilic Bacterium *Thermosporothrix Hazakensis*." *World Journal of Microbiology and Biotechnology* 39 (1): 30. <https://doi.org/10.1007/s11274-022-03463-6>.

Kaweewan, Issara, Hiroyuki Nakagawa, and Shinya Kodani. 2021. "Heterologous Expression of a Cryptic Gene Cluster from *Marinomonas Fungiae* Affords a Novel Tricyclic Peptide Marinomonasin." *Applied Microbiology and Biotechnology* 105 (19): 7241–50. <https://doi.org/10.1007/s00253-021-11545-y>.

Koos, Joseph D., and A. James Link. 2019. "Heterologous and *in Vitro* Reconstitution of Fuscanodin, a Lasso Peptide from *Thermobifida Fusca*." *Journal of the American Chemical Society* 141 (2): 928–35. <https://doi.org/10.1021/jacs.8b10724>.

Lasch, Constanze, Nils Gummerlich, Maksym Myronovskyi, Anja Paluszczak, Josef Zapp, and Andriy Luzhetskyy. 2020. "Loseolamycins: A Group of New Bioactive Alkylresorcinols Produced after Heterologous Expression of a Type III PKS from *Micromonospora Endolithica*." *Molecules* 25 (20): 4594. <https://doi.org/10.3390/molecules25204594>.

Lasch, Constanze, Marc Stierhof, Marta Rodríguez Estévez, Maksym Myronovskyi, Josef Zapp, and Andriy Luzhetskyy. 2020. "Dudomycins: New Secondary Metabolites Produced after Heterologous Expression of an Nrps Cluster from *Streptomyces Albus* Ssp. *Chlorinus* Nrrl B-24108." *Microorganisms* 8 (11): 1800. <https://doi.org/10.3390/microorganisms8111800>.

———. 2021. "Bonsecamin: A New Cyclic Pentapeptide Discovered through Heterologous Expression of a Cryptic Gene Cluster." *Microorganisms* 9 (8): 1640. <https://doi.org/10.3390/microorganisms9081640>.

Li, Zhong, Yuanyuan Jiang, Xingwang Zhang, Yimin Chang, Shuai Li, Xiaomin Zhang, Shanmin Zheng, et al. 2020. "Fragrant Venezuelaenes A and B with A 5–5–6–7 Tetracyclic Skeleton: Discovery, Biosynthesis, and Mechanisms of Central Catalysts." *ACS Catalysis* 10 (10): 5846–51. <https://doi.org/10.1021/acscatal.0c01575>.

Libis, Vincent, Logan W. MacIntyre, Rabia Mehmood, Liliana Guerrero, Melinda A. Ternei, Niv Antonovsky, Ján Burian, Zongqiang Wang, and Sean F. Brady. 2022. "Multiplexed Mobilization and Expression of Biosynthetic Gene Clusters." *Nature Communications* 13 (1): 5256. <https://doi.org/10.1038/s41467-022-32858-0>.

Liu, Jing, Xie, Xiulan, Li, Shu-Ming. 2019. Guanitrypmycin Biosynthetic Pathways Imply Cytochrome P450 Mediated Regio- and Stereospecific Guaninyl-Transfer Reactions. *Angewandte Chemie (International ed. in English)*, 58, 11534. <https://doi.org/10.1002/anie.201906891>.

Liu, Shuang He, Wen Wang, Kai Biao Wang, Bo Zhang, Wei Li, Jing Shi, Rui Hua Jiao, Ren Xiang Tan, and Hui Ming Ge. 2019. "Heterologous Expression of a Cryptic Giant Type I PKS Gene Cluster Leads to the Production of Ansaseomycin." *Organic Letters* 21 (10): 3785–88. <https://doi.org/10.1021/acs.orglett.9b01237>.

Liu, Yang, Haibo Zhou, Qiyao Shen, Guangzhi Dai, Fu Yan, Xiaoju Li, Xiangmei Ren, et al. 2021. "Discovery of Polycyclic Macrolide Shuangdaolides by Heterologous Expression of a Cryptic *Trans* -AT PKS Gene Cluster." *Organic Letters* 23 (17): 6967–71. <https://doi.org/10.1021/acs.orglett.1c02589>.

Mevaere, Jimmy, Christophe Goulard, Olha Schneider, Olga N. Sekurova, Haiyan Ma, Séverine Zirah, Carlos Afonso, Sylvie Rebuffat, Sergey B. Zotchev, and Yanyan Li. 2018. "An Orthogonal System for Heterologous Expression of Actinobacterial Lasso Peptides in *Streptomyces* Hosts." *Scientific Reports* 8 (1): 8232. <https://doi.org/10.1038/s41598-018-26620-0>.

Myronovskyi, Maksym, Birgit Rosenkränzer, Suvd Nadmid, Petar Pujic, Philippe Normand, and Andriy Luzhetskyy. 2018. "Generation of a Cluster-Free *Streptomyces Albus* Chassis Strains for Improved Heterologous Expression of Secondary Metabolite Clusters." *Metabolic Engineering* 49 (September): 316–24. <https://doi.org/10.1016/j.ymben.2018.09.004>.

Nguyen, Nguyet A., Ying Cong, Rachel C. Hurrell, Natalie Arias, Neha Garg, Aaron W. Puri, Eric W. Schmidt, and Vinayak Agarwal. 2022. "A Silent Biosynthetic Gene Cluster from a Methanotrophic Bacterium Potentiates Discovery of a Substrate Promiscuous Proteusin Cyclodehydratase." *ACS Chemical Biology* 17 (6): 1577–85. <https://doi.org/10.1021/acscchembio.2c00251>.

Paulus, Constanze, Maksym Myronovskyi, Josef Zapp, Marta Rodríguez Estévez, Maria Lopatniuk, Birgit Rosenkränzer, Anja Paluszczak, and Andriy Luzhetskyy. 2022. "Miramides A–D: Identification of Detoxin-like Depsipeptides after Heterologous Expression of a Hybrid NRPS-PKS Gene Cluster from *Streptomyces Mirabilis* Lu17588." *Microorganisms* 10 (9): 1752. <https://doi.org/10.3390/microorganisms10091752>.

Ren, Hengqian, Shravan R. Dommaraju, Chunshuai Huang, Haiyang Cui, Yuwei Pan, Marko Nestic, Lingyang Zhu, David Sarlah, Douglas A. Mitchell, and Huimin Zhao. 2023. "Genome Mining Unveils a Class of Ribosomal Peptides with Two Amino Termini." *Nature Communications* 14 (1): 1624. <https://doi.org/10.1038/s41467-023-37287-1>.

Santos-Aberturas, Javier, Govind Chandra, Luca Frattaruolo, Rodney Lacret, Thu H Pham, Natalia M Vior, Tom H Eyles, and Andrew W Truman. 2019. "Uncovering the Unexplored Diversity of Thioamidated Ribosomal Peptides in Actinobacteria Using the RiPPER Genome Mining Tool." *Nucleic Acids Research* 47 (9): 4624–37. <https://doi.org/10.1093/nar/gkz192>.

Shi, Jing, Xiang Xu, Pei Yi Liu, Yi Ling Hu, Bo Zhang, Rui Hua Jiao, Ghader Bashiri, Ren Xiang Tan, and Hui Ming Ge. 2021. "Discovery and Biosynthesis of Guanipiperazine from a NRPS-like Pathway." *Chemical Science* 12 (8): 2925–30. <https://doi.org/10.1039/D0SC06135B>.

Shi, Jing, Ying Jie Zeng, Bo Zhang, Fen Li Shao, Yan Chi Chen, Xiang Xu, Yang Sun, Qiang Xu, Ren Xiang Tan, and Hui Ming Ge. 2019. "Comparative Genome Mining and Heterologous Expression of an Orphan NRPS Gene Cluster Direct the Production of Ashimides." *Chemical Science* 10 (10): 3042–48. <https://doi.org/10.1039/C8SC05670F>.

Shuai, Hui, Maksym Myronovskyi, Suvd Nadmid, and Andriy Luzhetskyy. 2020. "Identification of a Biosynthetic Gene Cluster Responsible for the Production of a New Pyrrolopyrimidine Natural Product—Huimycin." *Biomolecules* 10 (7): 1074. <https://doi.org/10.3390/biom10071074>.

Singh, M., Chaudhary, S., & Sareen, D. (2020). Roseocin, a novel two-component lantibiotic from an actinomycete. *Molecular microbiology*, 113(2), 326–337. <https://doi.org/10.1111/mmi.14419>.

Thetsana, Chanaphat, Shinta Ijichi, Issara Kaweewan, Hiroyuki Nakagawa, and Shinya Kodani. 2022. "Heterologous Expression of a Cryptic Gene Cluster from a Marine Proteobacterium *Thalassomonas Actiniarum* Affords New Lanthipeptides Thalassomonasins A and B." *Journal of Applied Microbiology* 132 (5): 3629–39. <https://doi.org/10.1111/jam.15491>.

Unno, Kohta, Issara Kaweewan, Hiroyuki Nakagawa, and Shinya Kodani. 2020. "Heterologous Expression of a Cryptic Gene Cluster from *Grimontia Marina* Affords a Novel Tricyclic Peptide Grimoviridin." *Applied Microbiology and Biotechnology* 104 (12): 5293–5302. <https://doi.org/10.1007/s00253-020-10605-z>.

Vermeulen, Ross, Anton Du Preez Van Staden, Leonardo Joaquim Van Zyl, Leon M. T. Dicks, and Marla Trindade. 2022. "Unusual Class I Lanthipeptides from the Marine Bacteria *Thalassomonas Viridans*." *ACS Synthetic Biology* 11 (11): 3608–16. <https://doi.org/10.1021/acssynbio.2c00480>.

Wang, Xiaotong, Zongjie Wang, Zhiqi Dong, Yihai Yan, Youming Zhang, and Liujie Huo. 2023. "Deciphering the Biosynthesis of Novel Class I Lanthipeptides from Marine *Pseudoalteromonas* Reveals a Dehydratase PsfB with Dethiolation Activity." *ACS Chemical Biology* 18 (5): 1218–27. <https://doi.org/10.1021/acscchembio.3c00135>.

Wu, Changsheng, Zhuo Shang, Christophe Lemetre, Melinda A. Ternei, and Sean F. Brady. 2019. "Cadasides, Calcium-Dependent Acidic Lipopeptides from the Soil Metagenome That Are Active against Multidrug-Resistant Bacteria." *Journal of the American Chemical Society* 141 (9): 3910–19. <https://doi.org/10.1021/jacs.8b12087>.

Xu, Min, Wenliang Wang, Nicholas Waglechner, Elizabeth J. Culp, Allison K. Guitor, and Gerard D. Wright. 2020. "GPAHex-A Synthetic Biology Platform for Type IV–V Glycopeptide Antibiotic Production and Discovery." *Nature Communications* 11 (1): 5232. <https://doi.org/10.1038/s41467-020-19138-5>.

Xu, M., Zhang, F., Cheng, Z., Bashiri, G., Wang, J., Hong, J., Wang, Y., Xu, L., Chen, X., Huang, S. X., Lin, S., Deng, Z., & Tao, M. (2020). Functional Genome Mining Reveals a Class V Lanthipeptide Containing a d-Amino Acid Introduced by an  $F_{420} H_2$ -Dependent Reductase. *Angewandte Chemie (International ed. in English)*, 59(41), 18029–18035. <https://doi.org/10.1002/anie.202008035>.

Yuet, Kai P., Corey W. Liu, Stephen R. Lynch, James Kuo, Wesley Michaels, Robert B. Lee, Abigail E. McShane, Brian L. Zhong, Curt R. Fischer, and Chaitan Khosla. 2020. "Complete Reconstitution and Deorphanization of the 3 MDa Nocardiosis-Associated Polyketide Synthase." *Journal of the American Chemical Society* 142 (13): 5952–57. <https://doi.org/10.1021/jacs.0c00904>.

Zhang, Yuqiao, Tingting Yao, Yuechen Jiang, Huayue Li, Weicheng Yuan, and Wenli Li. 2021. "Deciphering a Cyclodipeptide Synthase Pathway Encoding Prenylated Indole Alkaloids in *Streptomyces Leeuwenhoekii*." Edited by Haruyuki Atomi. *Applied and Environmental Microbiology* 87 (11): e02525-20. <https://doi.org/10.1128/AEM.02525-20>.

Zhang, Y., Hong, Z., Zhou, L., Zhang, Z., Tang, T., Guo, E., Zheng, J., Wang, C., Dai, L., Si, T., & Wang, H. (2022). Biosynthesis of Gut-Microbiota-Derived Lantibiotics Reveals a Subgroup of S8 Family Proteases for Class III Leader Removal. *Angewandte Chemie (International ed. in English)*, 61(6), e202114414. <https://doi.org/10.1002/anie.202114414>.
